# Supplementary material
Source: bioRxiv or medRxiv preprint supplement (https://www.biorxiv.org/highwire/filestream/136963/field_highwire_adjunct_files/3/374553-4.pdf)
Supplement: Supplementary file [file 374553-4.pdf]

**Table S3.** Biocarta gene-set analysis of the GWAS meta-analysis of cocaine dependence

# MEAN\_SAMPLE\_SIZE = 6154  
 # TOTAL\_GENES = 18068  
 # ALPHA = 0.05  
 # FWER\_PERM = 10000  
 # FWER\_THRESH\_ALPHA = 0.000251509  
 # CONDITIONED\_INTERNAL = genesize, log\_genesize, genedensity, log\_genedensity, samplesize, log\_samplesize, inverse\_mac, log\_inverse\_mac

| SET                           | NGENES    | BETA         | BETA_STD      | SE           | P                 | P_CORR        | FULL_NAME                          |
|-------------------------------|-----------|--------------|---------------|--------------|-------------------|---------------|------------------------------------|
| <b>BIOCARTA_TNFR2_PATHWAY</b> | <b>17</b> | <b>0.637</b> | <b>0.0195</b> | <b>0.195</b> | <b>0.00053872</b> | <b>0.0965</b> | <b>BIOCARTA_TNFR2_PATHWAY</b>      |
| BIOCARTA_CD40_PATHWAY         | 13        | 0.507        | 0.0136        | 0.207        | 0.0070899         | 0.6568        | BIOCARTA_CD40_PATHWAY              |
| BIOCARTA_CYTOKINE_PATHWAY     | 21        | 0.44         | 0.015         | 0.182        | 0.0077664         | 0.6841        | BIOCARTA_CYTOKINE_PATHWAY          |
| BIOCARTA_CARDIACEGF_PA...     | 18        | 0.459        | 0.0145        | 0.192        | 0.0084954         | 0.7131        | BIOCARTA_CARDIACEGF_PATHWAY        |
| BIOCARTA_VITCB_PATHWAY        | 9         | 0.651        | 0.0145        | 0.318        | 0.020267          | 0.9333        | BIOCARTA_VITCB_PATHWAY             |
| BIOCARTA_CELLCYCLE_PAT...     | 23        | 0.334        | 0.0119        | 0.165        | 0.021578          | 0.9415        | BIOCARTA_CELLCYCLE_PATHWAY         |
| BIOCARTA_41BB_PATHWAY         | 17        | 0.359        | 0.011         | 0.181        | 0.023284          | 0.9528        | BIOCARTA_41BB_PATHWAY              |
| BIOCARTA_SKP2E2F_PATHWAY      | 10        | 0.508        | 0.0119        | 0.258        | 0.024373          | 0.9578        | BIOCARTA_SKP2E2F_PATHWAY           |
| BIOCARTA_NEUROTRANSMIT...     | 6         | 0.584        | 0.0106        | 0.306        | 0.028081          | 0.9731        | BIOCARTA_NEUROTRANSMITTERS_PATHWAY |
| BIOCARTA_NFKB_PATHWAY         | 21        | 0.278        | 0.00946       | 0.157        | 0.038119          | 0.992         | BIOCARTA_NFKB_PATHWAY              |
| BIOCARTA KERATINOCYTE_...     | 46        | 0.212        | 0.0107        | 0.121        | 0.039618          | 0.9934        | BIOCARTA KERATINOCYTE_PATHWAY      |
| BIOCARTA_EPONFKB_PATHWAY      | 11        | 0.371        | 0.00916       | 0.225        | 0.049773          | 0.998         | BIOCARTA_EPONFKB_PATHWAY           |
| BIOCARTA_EPO_PATHWAY          | 18        | 0.261        | 0.00823       | 0.16         | 0.051579          | 0.9984        | BIOCARTA_EPO_PATHWAY               |
| BIOCARTA_RELA_PATHWAY         | 15        | 0.282        | 0.00811       | 0.174        | 0.052547          | 0.9987        | BIOCARTA_RELA_PATHWAY              |
| BIOCARTA_ACE2_PATHWAY         | 9         | 0.465        | 0.0104        | 0.288        | 0.05283           | 0.9987        | BIOCARTA_ACE2_PATHWAY              |
| BIOCARTA_VEGF_PATHWAY         | 27        | 0.228        | 0.0088        | 0.145        | 0.057763          | 0.9991        | BIOCARTA_VEGF_PATHWAY              |
| BIOCARTA_D4GDI_PATHWAY        | 13        | 0.378        | 0.0101        | 0.244        | 0.060967          | 0.9994        | BIOCARTA_D4GDI_PATHWAY             |
| BIOCARTA_AKT_PATHWAY          | 20        | 0.242        | 0.00806       | 0.162        | 0.067307          | 0.9997        | BIOCARTA_AKT_PATHWAY               |
| BIOCARTA_EGFR_SMRTE_PA...     | 11        | 0.401        | 0.00988       | 0.271        | 0.069518          | 0.9998        | BIOCARTA_EGFR_SMRTE_PATHWAY        |
| BIOCARTA_STRESS_PATHWAY       | 24        | 0.217        | 0.00789       | 0.147        | 0.069708          | 0.9998        | BIOCARTA_STRESS_PATHWAY            |
| BIOCARTA_NKCELLS_PATHWAY      | 20        | 0.274        | 0.0091        | 0.186        | 0.07092           | 0.9998        | BIOCARTA_NKCELLS_PATHWAY           |
| BIOCARTA_CACAM_PATHWAY        | 13        | 0.31         | 0.00832       | 0.218        | 0.077638          | 0.9999        | BIOCARTA_CACAM_PATHWAY             |
| BIOCARTA_P27_PATHWAY          | 13        | 0.269        | 0.0072        | 0.21         | 0.10057           | 1             | BIOCARTA_P27_PATHWAY               |
| BIOCARTA_INFLAM_PATHWAY       | 27        | 0.2          | 0.00771       | 0.156        | 0.10063           | 1             | BIOCARTA_INFLAM_PATHWAY            |

|                           |    |        |         |       |         |   |                              |
|---------------------------|----|--------|---------|-------|---------|---|------------------------------|
| BIOCARTA_TID_PATHWAY      | 19 | 0.214  | 0.00695 | 0.17  | 0.10399 | 1 | BIOCARTA_TID_PATHWAY         |
| BIOCARTA_NTHI_PATHWAY     | 24 | 0.19   | 0.00692 | 0.158 | 0.11441 | 1 | BIOCARTA_NTHI_PATHWAY        |
| BIOCARTA_AKAP13_PATHWAY   | 12 | 0.293  | 0.00756 | 0.247 | 0.11753 | 1 | BIOCARTA_AKAP13_PATHWAY      |
| BIOCARTA_PGC1A_PATHWAY    | 23 | 0.192  | 0.00683 | 0.166 | 0.12379 | 1 | BIOCARTA_PGC1A_PATHWAY       |
| BIOCARTA_EIF2_PATHWAY     | 10 | 0.256  | 0.00603 | 0.222 | 0.12441 | 1 | BIOCARTA_EIF2_PATHWAY        |
| BIOCARTA_MCM_PATHWAY      | 18 | 0.191  | 0.00604 | 0.169 | 0.12894 | 1 | BIOCARTA_MCM_PATHWAY         |
| BIOCARTA_RACCYCD_PATHWAY  | 25 | 0.158  | 0.00586 | 0.144 | 0.13748 | 1 | BIOCARTA_RACCYCD_PATHWAY     |
| BIOCARTA_TALL1_PATHWAY    | 15 | 0.212  | 0.0061  | 0.207 | 0.15358 | 1 | BIOCARTA_TALL1_PATHWAY       |
| BIOCARTA_HIF_PATHWAY      | 15 | 0.189  | 0.00544 | 0.185 | 0.15428 | 1 | BIOCARTA_HIF_PATHWAY         |
| BIOCARTA_AHSP_PATHWAY     | 9  | 0.209  | 0.00467 | 0.212 | 0.16209 | 1 | BIOCARTA_AHSP_PATHWAY        |
| BIOCARTA_IL1R_PATHWAY     | 32 | 0.126  | 0.00529 | 0.132 | 0.1696  | 1 | BIOCARTA_IL1R_PATHWAY        |
| BIOCARTA_P53_PATHWAY      | 16 | 0.187  | 0.00557 | 0.204 | 0.17951 | 1 | BIOCARTA_P53_PATHWAY         |
| BIOCARTA_TPO_PATHWAY      | 24 | 0.129  | 0.00471 | 0.147 | 0.18933 | 1 | BIOCARTA_TPO_PATHWAY         |
| BIOCARTA_ETS_PATHWAY      | 18 | 0.15   | 0.00474 | 0.181 | 0.20359 | 1 | BIOCARTA_ETS_PATHWAY         |
| BIOCARTA_TRKA_PATHWAY     | 12 | 0.151  | 0.00389 | 0.185 | 0.20797 | 1 | BIOCARTA_TRKA_PATHWAY        |
| BIOCARTA_CALCINEURIN_P... | 18 | 0.148  | 0.00467 | 0.185 | 0.21169 | 1 | BIOCARTA_CALCINEURIN_PATHWAY |
| BIOCARTA_PPARA_PATHWAY    | 56 | 0.0827 | 0.0046  | 0.105 | 0.21566 | 1 | BIOCARTA_PPARA_PATHWAY       |
| BIOCARTA_BCR_PATHWAY      | 32 | 0.1    | 0.00423 | 0.129 | 0.21773 | 1 | BIOCARTA_BCR_PATHWAY         |
| BIOCARTA_IL22BP_PATHWAY   | 16 | 0.179  | 0.00533 | 0.231 | 0.21859 | 1 | BIOCARTA_IL22BP_PATHWAY      |
| BIOCARTA_ARENRF2_PATHWAY  | 13 | 0.163  | 0.00438 | 0.214 | 0.22298 | 1 | BIOCARTA_ARENRF2_PATHWAY     |
| BIOCARTA_PTC1_PATHWAY     | 11 | 0.163  | 0.00403 | 0.217 | 0.22589 | 1 | BIOCARTA_PTC1_PATHWAY        |
| BIOCARTA_IL2RB_PATHWAY    | 37 | 0.0868 | 0.00392 | 0.121 | 0.23726 | 1 | BIOCARTA_IL2RB_PATHWAY       |
| BIOCARTA_PROTEASOME_PA... | 26 | 0.105  | 0.00399 | 0.148 | 0.23872 | 1 | BIOCARTA_PROTEASOME_PATHWAY  |
| BIOCARTA_RAS_PATHWAY      | 21 | 0.109  | 0.00372 | 0.159 | 0.2462  | 1 | BIOCARTA_RAS_PATHWAY         |
| BIOCARTA_SET_PATHWAY      | 11 | 0.171  | 0.00422 | 0.252 | 0.24853 | 1 | BIOCARTA_SET_PATHWAY         |
| BIOCARTA_AKAP95_PATHWAY   | 12 | 0.155  | 0.004   | 0.235 | 0.25463 | 1 | BIOCARTA_AKAP95_PATHWAY      |
| BIOCARTA_IL2_PATHWAY      | 20 | 0.112  | 0.00372 | 0.171 | 0.25672 | 1 | BIOCARTA_IL2_PATHWAY         |
| BIOCARTA_TOLL_PATHWAY     | 33 | 0.0768 | 0.00328 | 0.118 | 0.25698 | 1 | BIOCARTA_TOLL_PATHWAY        |
| BIOCARTA_IL6_PATHWAY      | 21 | 0.105  | 0.00356 | 0.162 | 0.25865 | 1 | BIOCARTA_IL6_PATHWAY         |
| BIOCARTA_CDMAC_PATHWAY    | 16 | 0.128  | 0.0038  | 0.201 | 0.26213 | 1 | BIOCARTA_CDMAC_PATHWAY       |
| BIOCARTA_IL7_PATHWAY      | 16 | 0.121  | 0.00361 | 0.192 | 0.26348 | 1 | BIOCARTA_IL7_PATHWAY         |
| BIOCARTA_IL3_PATHWAY      | 14 | 0.121  | 0.00337 | 0.193 | 0.26479 | 1 | BIOCARTA_IL3_PATHWAY         |
| BIOCARTA_SHH_PATHWAY      | 16 | 0.133  | 0.00397 | 0.217 | 0.26966 | 1 | BIOCARTA_SHH_PATHWAY         |

|                           |    |        |         |       |         |   |                                 |
|---------------------------|----|--------|---------|-------|---------|---|---------------------------------|
| BIOCARTA_SRCRPTP_PATHWAY  | 11 | 0.114  | 0.00282 | 0.193 | 0.27667 | 1 | BIOCARTA_SRCRPTP_PATHWAY        |
| BIOCARTA_PYK2_PATHWAY     | 28 | 0.078  | 0.00307 | 0.136 | 0.28357 | 1 | BIOCARTA_PYK2_PATHWAY           |
| BIOCARTA_ERK5_PATHWAY     | 18 | 0.0892 | 0.00282 | 0.159 | 0.28739 | 1 | BIOCARTA_ERK5_PATHWAY           |
| BIOCARTA_PARKIN_PATHWAY   | 12 | 0.133  | 0.00344 | 0.239 | 0.28873 | 1 | BIOCARTA_PARKIN_PATHWAY         |
| BIOCARTA_MYOSIN_PATHWAY   | 29 | 0.0768 | 0.00307 | 0.139 | 0.29025 | 1 | BIOCARTA_MYOSIN_PATHWAY         |
| BIOCARTA_VIP_PATHWAY      | 26 | 0.084  | 0.00319 | 0.159 | 0.29856 | 1 | BIOCARTA_VIP_PATHWAY            |
| BIOCARTA_COMP_PATHWAY     | 18 | 0.103  | 0.00324 | 0.197 | 0.30101 | 1 | BIOCARTA_COMP_PATHWAY           |
| BIOCARTA_EGF_PATHWAY      | 30 | 0.0732 | 0.00298 | 0.142 | 0.30338 | 1 | BIOCARTA_EGF_PATHWAY            |
| BIOCARTA_STATHMIN_PATHWAY | 19 | 0.0969 | 0.00314 | 0.193 | 0.30813 | 1 | BIOCARTA_STATHMIN_PATHWAY       |
| BIOCARTA_GH_PATHWAY       | 28 | 0.0679 | 0.00267 | 0.136 | 0.30833 | 1 | BIOCARTA_GH_PATHWAY             |
| BIOCARTA_PAR1_PATHWAY     | 35 | 0.064  | 0.00281 | 0.129 | 0.31055 | 1 | BIOCARTA_PAR1_PATHWAY           |
| BIOCARTA_STEM_PATHWAY     | 15 | 0.0862 | 0.00248 | 0.196 | 0.3297  | 1 | BIOCARTA_STEM_PATHWAY           |
| BIOCARTA_NGF_PATHWAY      | 17 | 0.0725 | 0.00222 | 0.171 | 0.33576 | 1 | BIOCARTA_NGF_PATHWAY            |
| BIOCARTA_CLASSIC_PATHWAY  | 13 | 0.0937 | 0.00251 | 0.223 | 0.33703 | 1 | BIOCARTA_CLASSIC_PATHWAY        |
| BIOCARTA_CCR5_PATHWAY     | 17 | 0.0778 | 0.00239 | 0.185 | 0.33705 | 1 | BIOCARTA_CCR5_PATHWAY           |
| BIOCARTA_NOS1_PATHWAY     | 21 | 0.0767 | 0.00261 | 0.185 | 0.33887 | 1 | BIOCARTA_NOS1_PATHWAY           |
| BIOCARTA_PTDINS_PATHWAY   | 22 | 0.0592 | 0.00206 | 0.144 | 0.34095 | 1 | BIOCARTA_PTDINS_PATHWAY         |
| BIOCARTA_ATM_PATHWAY      | 20 | 0.0766 | 0.00255 | 0.195 | 0.34714 | 1 | BIOCARTA_ATM_PATHWAY            |
| BIOCARTA_RANKL_PATHWAY    | 14 | 0.0771 | 0.00214 | 0.199 | 0.34916 | 1 | BIOCARTA_RANKL_PATHWAY          |
| BIOCARTA_FREE_PATHWAY     | 9  | 0.0919 | 0.00205 | 0.24  | 0.35124 | 1 | BIOCARTA_FREE_PATHWAY           |
| BIOCARTA_TCR_PATHWAY      | 45 | 0.0416 | 0.00207 | 0.112 | 0.35475 | 1 | BIOCARTA_TCR_PATHWAY            |
| BIOCARTA_PDGF_PATHWAY     | 30 | 0.052  | 0.00212 | 0.142 | 0.35724 | 1 | BIOCARTA_PDGF_PATHWAY           |
| BIOCARTA_G2_PATHWAY       | 24 | 0.0559 | 0.00204 | 0.159 | 0.36216 | 1 | BIOCARTA_G2_PATHWAY             |
| BIOCARTA_NDKDYNAMIN_PA... | 18 | 0.0629 | 0.00198 | 0.179 | 0.36245 | 1 | BIOCARTA_NDKDYNAMIN_PATHWAY     |
| BIOCARTA_GATA3_PATHWAY    | 16 | 0.0752 | 0.00224 | 0.218 | 0.36478 | 1 | BIOCARTA_GATA3_PATHWAY          |
| BIOCARTA_ASBCCELL_PATHWAY | 10 | 0.0847 | 0.00199 | 0.249 | 0.36666 | 1 | BIOCARTA_ASBCCELL_PATHWAY       |
| BIOCARTA_RB_PATHWAY       | 13 | 0.0693 | 0.00186 | 0.206 | 0.36835 | 1 | BIOCARTA_RB_PATHWAY             |
| BIOCARTA_IGF1MTOR_PATHWAY | 19 | 0.0573 | 0.00186 | 0.172 | 0.3695  | 1 | BIOCARTA_IGF1MTOR_PATHWAY       |
| BIOCARTA_DC_PATHWAY       | 21 | 0.0575 | 0.00196 | 0.173 | 0.37004 | 1 | BIOCARTA_DC_PATHWAY             |
| BIOCARTA_AKAPCENTROSOM... | 15 | 0.0651 | 0.00188 | 0.197 | 0.37035 | 1 | BIOCARTA_AKAPCENTROSOME_PATHWAY |
| BIOCARTA_CARM1_PATHWAY    | 13 | 0.07   | 0.00188 | 0.212 | 0.37045 | 1 | BIOCARTA_CARM1_PATHWAY          |
| BIOCARTA_CERAMIDE_PATHWAY | 21 | 0.0532 | 0.00181 | 0.161 | 0.37053 | 1 | BIOCARTA_CERAMIDE_PATHWAY       |
| BIOCARTA_BAD_PATHWAY      | 25 | 0.0456 | 0.0017  | 0.153 | 0.3825  | 1 | BIOCARTA_BAD_PATHWAY            |

|                           |    |          |           |        |         |   |                                |
|---------------------------|----|----------|-----------|--------|---------|---|--------------------------------|
| BIOCARTA_AGR_PATHWAY      | 34 | 0.0404   | 0.00175   | 0.14   | 0.38625 | 1 | BIOCARTA_AGR_PATHWAY           |
| BIOCARTA_BCELLSURVIVAL... | 15 | 0.0484   | 0.00139   | 0.176  | 0.39134 | 1 | BIOCARTA_BCELLSURVIVAL_PATHWAY |
| BIOCARTA_CELL2CELL_PAT... | 14 | 0.0564   | 0.00157   | 0.212  | 0.39506 | 1 | BIOCARTA_CELL2CELL_PATHWAY     |
| BIOCARTA_ETC_PATHWAY      | 9  | 0.0622   | 0.00139   | 0.239  | 0.39723 | 1 | BIOCARTA_ETC_PATHWAY           |
| BIOCARTA_AT1R_PATHWAY     | 32 | 0.0332   | 0.0014    | 0.136  | 0.40396 | 1 | BIOCARTA_AT1R_PATHWAY          |
| BIOCARTA_CTCF_PATHWAY     | 23 | 0.0371   | 0.00132   | 0.162  | 0.40917 | 1 | BIOCARTA_CTCF_PATHWAY          |
| BIOCARTA_RANMS_PATHWAY    | 10 | 0.0693   | 0.00163   | 0.305  | 0.41022 | 1 | BIOCARTA_RANMS_PATHWAY         |
| BIOCARTA_LONGEVITY_PAT... | 15 | 0.0396   | 0.00114   | 0.183  | 0.41425 | 1 | BIOCARTA_LONGEVITY_PATHWAY     |
| BIOCARTA_INSULIN_PATHWAY  | 21 | 0.0328   | 0.00112   | 0.164  | 0.42087 | 1 | BIOCARTA_INSULIN_PATHWAY       |
| BIOCARTA_G1_PATHWAY       | 28 | 0.0262   | 0.00103   | 0.149  | 0.43013 | 1 | BIOCARTA_G1_PATHWAY            |
| BIOCARTA_IL5_PATHWAY      | 9  | 0.0254   | 0.000567  | 0.27   | 0.46246 | 1 | BIOCARTA_IL5_PATHWAY           |
| BIOCARTA_MAPK_PATHWAY     | 84 | 0.00515  | 0.000351  | 0.0794 | 0.47412 | 1 | BIOCARTA_MAPK_PATHWAY          |
| BIOCARTA_LLECTIN_PATHWAY  | 12 | 0.00143  | 3.69E-05  | 0.225  | 0.49746 | 1 | BIOCARTA_LLECTIN_PATHWAY       |
| BIOCARTA_CREB_PATHWAY     | 27 | -0.00696 | -0.000269 | 0.146  | 0.51901 | 1 | BIOCARTA_CREB_PATHWAY          |
| BIOCARTA_PML_PATHWAY      | 17 | -0.0122  | -0.000375 | 0.173  | 0.52818 | 1 | BIOCARTA_PML_PATHWAY           |
| BIOCARTA_FCER1_PATHWAY    | 36 | -0.01    | -0.000447 | 0.125  | 0.53187 | 1 | BIOCARTA_FCER1_PATHWAY         |
| BIOCARTA_DEATH_PATHWAY    | 32 | -0.013   | -0.000545 | 0.136  | 0.53796 | 1 | BIOCARTA_DEATH_PATHWAY         |
| BIOCARTA_IGF1_PATHWAY     | 20 | -0.016   | -0.000533 | 0.166  | 0.53857 | 1 | BIOCARTA_IGF1_PATHWAY          |
| BIOCARTA_ARF_PATHWAY      | 17 | -0.0177  | -0.000542 | 0.181  | 0.5389  | 1 | BIOCARTA_ARF_PATHWAY           |
| BIOCARTA_CTL_PATHWAY      | 15 | -0.0224  | -0.000645 | 0.22   | 0.5405  | 1 | BIOCARTA_CTL_PATHWAY           |
| BIOCARTA_SARS_PATHWAY     | 10 | -0.0313  | -0.000737 | 0.247  | 0.55039 | 1 | BIOCARTA_SARS_PATHWAY          |
| BIOCARTA_ERYTH_PATHWAY    | 15 | -0.0257  | -0.00074  | 0.182  | 0.55596 | 1 | BIOCARTA_ERYTH_PATHWAY         |
| BIOCARTA_GLEEEVEC_PATHWAY | 23 | -0.0233  | -0.000832 | 0.16   | 0.55779 | 1 | BIOCARTA_GLEEEVEC_PATHWAY      |
| BIOCARTA_CDC42RAC_PATHWAY | 16 | -0.0274  | -0.000816 | 0.185  | 0.55891 | 1 | BIOCARTA_CDC42RAC_PATHWAY      |
| BIOCARTA_HCMV_PATHWAY     | 17 | -0.0285  | -0.000875 | 0.189  | 0.56018 | 1 | BIOCARTA_HCMV_PATHWAY          |
| BIOCARTA_CBL_PATHWAY      | 12 | -0.039   | -0.001    | 0.249  | 0.56212 | 1 | BIOCARTA_CBL_PATHWAY           |
| BIOCARTA_SPRY_PATHWAY     | 17 | -0.0306  | -0.000939 | 0.19   | 0.5642  | 1 | BIOCARTA_SPRY_PATHWAY          |
| BIOCARTA_SALMONELLA_PA... | 13 | -0.0397  | -0.00107  | 0.205  | 0.57699 | 1 | BIOCARTA_SALMONELLA_PATHWAY    |
| BIOCARTA_FEEDER_PATHWAY   | 9  | -0.0473  | -0.00105  | 0.241  | 0.57766 | 1 | BIOCARTA_FEEDER_PATHWAY        |
| BIOCARTA_VDR_PATHWAY      | 12 | -0.0475  | -0.00122  | 0.241  | 0.57807 | 1 | BIOCARTA_VDR_PATHWAY           |
| BIOCARTA_DREAM_PATHWAY    | 14 | -0.0459  | -0.00128  | 0.219  | 0.58295 | 1 | BIOCARTA_DREAM_PATHWAY         |
| BIOCARTA_ACTINY_PATHWAY   | 19 | -0.0392  | -0.00127  | 0.186  | 0.58326 | 1 | BIOCARTA_ACTINY_PATHWAY        |
| BIOCARTA_ACH_PATHWAY      | 16 | -0.0434  | -0.00129  | 0.196  | 0.58768 | 1 | BIOCARTA_ACH_PATHWAY           |

|                           |    |         |          |       |         |   |                                |
|---------------------------|----|---------|----------|-------|---------|---|--------------------------------|
| BIOCARTA_RARRXR_PATHWAY   | 15 | -0.0409 | -0.00118 | 0.183 | 0.5886  | 1 | BIOCARTA_RARRXR_PATHWAY        |
| BIOCARTA_MTOR_PATHWAY     | 23 | -0.0322 | -0.00115 | 0.142 | 0.59007 | 1 | BIOCARTA_MTOR_PATHWAY          |
| BIOCARTA_NKT_PATHWAY      | 27 | -0.043  | -0.00166 | 0.159 | 0.60632 | 1 | BIOCARTA_NKT_PATHWAY           |
| BIOCARTA_MITOCHONDRIA_... | 19 | -0.0494 | -0.0016  | 0.17  | 0.61429 | 1 | BIOCARTA_MITOCHONDRIA_PATHWAY  |
| BIOCARTA_TH1TH2_PATHWAY   | 17 | -0.0553 | -0.0017  | 0.189 | 0.61538 | 1 | BIOCARTA_TH1TH2_PATHWAY        |
| BIOCARTA_CFTR_PATHWAY     | 12 | -0.0734 | -0.00189 | 0.242 | 0.61906 | 1 | BIOCARTA_CFTR_PATHWAY          |
| BIOCARTA_RNA_PATHWAY      | 10 | -0.0714 | -0.00168 | 0.23  | 0.62167 | 1 | BIOCARTA_RNA_PATHWAY           |
| BIOCARTA_CHEMICAL_PATHWAY | 22 | -0.0478 | -0.00167 | 0.153 | 0.62227 | 1 | BIOCARTA_CHEMICAL_PATHWAY      |
| BIOCARTA_KREB_PATHWAY     | 8  | -0.0969 | -0.00204 | 0.296 | 0.62826 | 1 | BIOCARTA_KREB_PATHWAY          |
| BIOCARTA_P35ALZHEIMERS... | 11 | -0.079  | -0.00195 | 0.239 | 0.62961 | 1 | BIOCARTA_P35ALZHEIMERS_PATHWAY |
| BIOCARTA_IL4_PATHWAY      | 10 | -0.0737 | -0.00173 | 0.22  | 0.63124 | 1 | BIOCARTA_IL4_PATHWAY           |
| BIOCARTA_GABA_PATHWAY     | 9  | -0.121  | -0.0027  | 0.293 | 0.65991 | 1 | BIOCARTA_GABA_PATHWAY          |
| BIOCARTA_BARRESTIN_PAT... | 10 | -0.0879 | -0.00207 | 0.212 | 0.66068 | 1 | BIOCARTA_BARRESTIN_PATHWAY     |
| BIOCARTA_EIF_PATHWAY      | 14 | -0.0795 | -0.00221 | 0.188 | 0.66349 | 1 | BIOCARTA_EIF_PATHWAY           |
| BIOCARTA_TCRA_PATHWAY     | 12 | -0.101  | -0.0026  | 0.233 | 0.66757 | 1 | BIOCARTA_TCRA_PATHWAY          |
| BIOCARTA_PTEN_PATHWAY     | 18 | -0.0716 | -0.00226 | 0.162 | 0.67069 | 1 | BIOCARTA_PTEN_PATHWAY          |
| BIOCARTA_MEF2D_PATHWAY    | 20 | -0.0852 | -0.00283 | 0.188 | 0.67525 | 1 | BIOCARTA_MEF2D_PATHWAY         |
| BIOCARTA_GCR_PATHWAY      | 19 | -0.0844 | -0.00273 | 0.174 | 0.68582 | 1 | BIOCARTA_GCR_PATHWAY           |
| BIOCARTA_NUCLEARRS_PAT... | 14 | -0.098  | -0.00273 | 0.199 | 0.68876 | 1 | BIOCARTA_NUCLEARRS_PATHWAY     |
| BIOCARTA_CSK_PATHWAY      | 23 | -0.0801 | -0.00286 | 0.16  | 0.69183 | 1 | BIOCARTA_CSK_PATHWAY           |
| BIOCARTA_GLYCOLYSIS_PA... | 9  | -0.115  | -0.00258 | 0.217 | 0.70279 | 1 | BIOCARTA_GLYCOLYSIS_PATHWAY    |
| BIOCARTA_EIF4_PATHWAY     | 24 | -0.0788 | -0.00287 | 0.146 | 0.70471 | 1 | BIOCARTA_EIF4_PATHWAY          |
| BIOCARTA_TCAPOPTOSIS_P... | 11 | -0.137  | -0.00337 | 0.25  | 0.70773 | 1 | BIOCARTA_TCAPOPTOSIS_PATHWAY   |
| BIOCARTA_MET_PATHWAY      | 36 | -0.0747 | -0.00333 | 0.133 | 0.71208 | 1 | BIOCARTA_MET_PATHWAY           |
| BIOCARTA_PITX2_PATHWAY    | 14 | -0.114  | -0.00318 | 0.203 | 0.71337 | 1 | BIOCARTA_PITX2_PATHWAY         |
| BIOCARTA_INTRINSIC_PAT... | 19 | -0.103  | -0.00335 | 0.183 | 0.71429 | 1 | BIOCARTA_INTRINSIC_PATHWAY     |
| BIOCARTA_NO1_PATHWAY      | 30 | -0.0864 | -0.00352 | 0.151 | 0.71655 | 1 | BIOCARTA_NO1_PATHWAY           |
| BIOCARTA_FAS_PATHWAY      | 30 | -0.0848 | -0.00345 | 0.144 | 0.72213 | 1 | BIOCARTA_FAS_PATHWAY           |
| BIOCARTA_PLATELETAPP_P... | 11 | -0.141  | -0.00348 | 0.239 | 0.72259 | 1 | BIOCARTA_PLATELETAPP_PATHWAY   |
| BIOCARTA_BIOPEPTIDES_P... | 41 | -0.0703 | -0.00334 | 0.117 | 0.72521 | 1 | BIOCARTA_BIOPEPTIDES_PATHWAY   |
| BIOCARTA_P38MAPK_PATHWAY  | 39 | -0.0712 | -0.0033  | 0.119 | 0.72599 | 1 | BIOCARTA_P38MAPK_PATHWAY       |
| BIOCARTA_LAIR_PATHWAY     | 17 | -0.129  | -0.00394 | 0.2   | 0.7399  | 1 | BIOCARTA_LAIR_PATHWAY          |
| BIOCARTA_SODD_PATHWAY     | 10 | -0.159  | -0.00374 | 0.241 | 0.74483 | 1 | BIOCARTA_SODD_PATHWAY          |

|                           |    |         |          |       |         |   |                               |
|---------------------------|----|---------|----------|-------|---------|---|-------------------------------|
| BIOCARTA_LEPTIN_PATHWAY   | 11 | -0.152  | -0.00376 | 0.231 | 0.74577 | 1 | BIOCARTA_LEPTIN_PATHWAY       |
| BIOCARTA_FIBRINOLYSIS_... | 12 | -0.149  | -0.00384 | 0.221 | 0.74958 | 1 | BIOCARTA_FIBRINOLYSIS_PATHWAY |
| BIOCARTA_IL17_PATHWAY     | 17 | -0.141  | -0.00432 | 0.204 | 0.75489 | 1 | BIOCARTA_IL17_PATHWAY         |
| BIOCARTA_CHREBP2_PATHWAY  | 41 | -0.0819 | -0.00389 | 0.115 | 0.76119 | 1 | BIOCARTA_CHREBP2_PATHWAY      |
| BIOCARTA_EDG1_PATHWAY     | 26 | -0.105  | -0.004   | 0.148 | 0.76233 | 1 | BIOCARTA_EDG1_PATHWAY         |
| BIOCARTA_LYM_PATHWAY      | 11 | -0.203  | -0.005   | 0.271 | 0.77259 | 1 | BIOCARTA_LYM_PATHWAY          |
| BIOCARTA_GPCR_PATHWAY     | 32 | -0.108  | -0.00452 | 0.135 | 0.78748 | 1 | BIOCARTA_GPCR_PATHWAY         |
| BIOCARTA_IGF1R_PATHWAY    | 23 | -0.123  | -0.0044  | 0.152 | 0.79088 | 1 | BIOCARTA_IGF1R_PATHWAY        |
| BIOCARTA_HSP27_PATHWAY    | 15 | -0.159  | -0.00459 | 0.196 | 0.79242 | 1 | BIOCARTA_HSP27_PATHWAY        |
| BIOCARTA_TEL_PATHWAY      | 18 | -0.154  | -0.00487 | 0.187 | 0.79563 | 1 | BIOCARTA_TEL_PATHWAY          |
| BIOCARTA_CTLA4_PATHWAY    | 20 | -0.151  | -0.00501 | 0.181 | 0.79694 | 1 | BIOCARTA_CTLA4_PATHWAY        |
| BIOCARTA_UCALPAIN_PATHWAY | 18 | -0.149  | -0.0047  | 0.176 | 0.80073 | 1 | BIOCARTA_UCALPAIN_PATHWAY     |
| BIOCARTA_AGPCR_PATHWAY    | 13 | -0.185  | -0.00495 | 0.213 | 0.80659 | 1 | BIOCARTA_AGPCR_PATHWAY        |
| BIOCARTA_IL12_PATHWAY     | 22 | -0.158  | -0.0055  | 0.177 | 0.81332 | 1 | BIOCARTA_IL12_PATHWAY         |
| BIOCARTA_MPR_PATHWAY      | 34 | -0.119  | -0.00517 | 0.133 | 0.81594 | 1 | BIOCARTA_MPR_PATHWAY          |
| BIOCARTA_CASPASE_PATHWAY  | 22 | -0.145  | -0.00507 | 0.16  | 0.81815 | 1 | BIOCARTA_CASPASE_PATHWAY      |
| BIOCARTA_RAB_PATHWAY      | 11 | -0.224  | -0.00552 | 0.246 | 0.81819 | 1 | BIOCARTA_RAB_PATHWAY          |
| BIOCARTA_RHO_PATHWAY      | 29 | -0.131  | -0.00524 | 0.143 | 0.81907 | 1 | BIOCARTA_RHO_PATHWAY          |
| BIOCARTA_ATRBRCA_PATHWAY  | 21 | -0.166  | -0.00564 | 0.175 | 0.82728 | 1 | BIOCARTA_ATRBRCA_PATHWAY      |
| BIOCARTA_CK1_PATHWAY      | 17 | -0.182  | -0.00559 | 0.193 | 0.82815 | 1 | BIOCARTA_CK1_PATHWAY          |
| BIOCARTA_CXCR4_PATHWAY    | 24 | -0.15   | -0.00548 | 0.151 | 0.83983 | 1 | BIOCARTA_CXCR4_PATHWAY        |
| BIOCARTA_IL10_PATHWAY     | 17 | -0.218  | -0.00669 | 0.216 | 0.84424 | 1 | BIOCARTA_IL10_PATHWAY         |
| BIOCARTA_MCALPAIN_PATHWAY | 24 | -0.162  | -0.00589 | 0.159 | 0.84552 | 1 | BIOCARTA_MCALPAIN_PATHWAY     |
| BIOCARTA_PS1_PATHWAY      | 13 | -0.244  | -0.00654 | 0.221 | 0.86474 | 1 | BIOCARTA_PS1_PATHWAY          |
| BIOCARTA_GSK3_PATHWAY     | 25 | -0.161  | -0.00598 | 0.143 | 0.86968 | 1 | BIOCARTA_GSK3_PATHWAY         |
| BIOCARTA_TOB1_PATHWAY     | 21 | -0.201  | -0.00685 | 0.177 | 0.87215 | 1 | BIOCARTA_TOB1_PATHWAY         |
| BIOCARTA_TCYTOTOXIC_PA... | 14 | -0.262  | -0.00728 | 0.226 | 0.87605 | 1 | BIOCARTA_TCYTOTOXIC_PATHWAY   |
| BIOCARTA_ALK_PATHWAY      | 36 | -0.154  | -0.00685 | 0.133 | 0.87654 | 1 | BIOCARTA_ALK_PATHWAY          |
| BIOCARTA_TFF_PATHWAY      | 21 | -0.191  | -0.0065  | 0.162 | 0.88102 | 1 | BIOCARTA_TFF_PATHWAY          |
| BIOCARTA_PLCE_PATHWAY     | 12 | -0.307  | -0.0079  | 0.258 | 0.88299 | 1 | BIOCARTA_PLCE_PATHWAY         |
| BIOCARTA_AMI_PATHWAY      | 18 | -0.232  | -0.00731 | 0.184 | 0.89621 | 1 | BIOCARTA_AMI_PATHWAY          |
| BIOCARTA_HER2_PATHWAY     | 22 | -0.205  | -0.00714 | 0.155 | 0.90601 | 1 | BIOCARTA_HER2_PATHWAY         |
| BIOCARTA_DNAFRAGMENT_P... | 10 | -0.335  | -0.00788 | 0.252 | 0.90813 | 1 | BIOCARTA_DNAFRAGMENT_PATHWAY  |

|                                |    |        |          |       |         |   |                                |
|--------------------------------|----|--------|----------|-------|---------|---|--------------------------------|
| BIOCARTA_EXTRINSIC_PATHWAY     | 13 | -0.282 | -0.00755 | 0.21  | 0.90988 | 1 | BIOCARTA_EXTRINSIC_PATHWAY     |
| BIOCARTA_THELPER_PATHWAY       | 14 | -0.311 | -0.00865 | 0.227 | 0.9149  | 1 | BIOCARTA_THELPER_PATHWAY       |
| BIOCARTA_INTEGRIN_PATHWAY      | 38 | -0.166 | -0.0076  | 0.121 | 0.91523 | 1 | BIOCARTA_INTEGRIN_PATHWAY      |
| BIOCARTA_HIVNEF_PATHWAY        | 55 | -0.15  | -0.00828 | 0.107 | 0.91986 | 1 | BIOCARTA_HIVNEF_PATHWAY        |
| BIOCARTA_MAL_PATHWAY           | 19 | -0.217 | -0.00702 | 0.154 | 0.92058 | 1 | BIOCARTA_MAL_PATHWAY           |
| BIOCARTA_NFAT_PATHWAY          | 53 | -0.153 | -0.00825 | 0.107 | 0.92292 | 1 | BIOCARTA_NFAT_PATHWAY          |
| BIOCARTA_BARR_MAPK_PATHWAY     | 12 | -0.312 | -0.00804 | 0.216 | 0.92572 | 1 | BIOCARTA_BARR_MAPK_PATHWAY     |
| BIOCARTA_RAC1_PATHWAY          | 23 | -0.24  | -0.00855 | 0.159 | 0.93405 | 1 | BIOCARTA_RAC1_PATHWAY          |
| BIOCARTA_TNFR1_PATHWAY         | 29 | -0.22  | -0.00882 | 0.146 | 0.93469 | 1 | BIOCARTA_TNFR1_PATHWAY         |
| BIOCARTA_HDAC_PATHWAY          | 29 | -0.24  | -0.00959 | 0.156 | 0.93721 | 1 | BIOCARTA_HDAC_PATHWAY          |
| BIOCARTA_FMPL_PATHWAY          | 34 | -0.206 | -0.00894 | 0.132 | 0.94036 | 1 | BIOCARTA_FMPL_PATHWAY          |
| BIOCARTA_NO2IL12_PATHWAY       | 16 | -0.311 | -0.00924 | 0.196 | 0.9434  | 1 | BIOCARTA_NO2IL12_PATHWAY       |
| BIOCARTA_TGFB_PATHWAY          | 19 | -0.285 | -0.00922 | 0.178 | 0.94488 | 1 | BIOCARTA_TGFB_PATHWAY          |
| BIOCARTA_GRANULOCYTES_PATHWAY  | 14 | -0.356 | -0.0099  | 0.22  | 0.94734 | 1 | BIOCARTA_GRANULOCYTES_PATHWAY  |
| BIOCARTA_P53HYPOXIA_PATHWAY    | 21 | -0.249 | -0.00848 | 0.153 | 0.948   | 1 | BIOCARTA_P53HYPOXIA_PATHWAY    |
| BIOCARTA_EPHA4_PATHWAY         | 9  | -0.474 | -0.0106  | 0.281 | 0.95427 | 1 | BIOCARTA_EPHA4_PATHWAY         |
| BIOCARTA_CDK5_PATHWAY          | 11 | -0.398 | -0.00983 | 0.235 | 0.95481 | 1 | BIOCARTA_CDK5_PATHWAY          |
| BIOCARTA_BLYMPHOCYTE_PATHWAY   | 10 | -0.48  | -0.0113  | 0.278 | 0.95808 | 1 | BIOCARTA_BLYMPHOCYTE_PATHWAY   |
| BIOCARTA_ERK_PATHWAY           | 27 | -0.26  | -0.01    | 0.145 | 0.9633  | 1 | BIOCARTA_ERK_PATHWAY           |
| BIOCARTA_BARRESTIN_SRC_PATHWAY | 15 | -0.354 | -0.0102  | 0.198 | 0.96334 | 1 | BIOCARTA_BARRESTIN_SRC_PATHWAY |
| BIOCARTA_CARM_ER_PATHWAY       | 31 | -0.226 | -0.00937 | 0.119 | 0.97103 | 1 | BIOCARTA_CARM_ER_PATHWAY       |
| BIOCARTA_MTA3_PATHWAY          | 18 | -0.412 | -0.013   | 0.214 | 0.9732  | 1 | BIOCARTA_MTA3_PATHWAY          |
| BIOCARTA_MONOCYTE_PATHWAY      | 11 | -0.53  | -0.0131  | 0.266 | 0.97676 | 1 | BIOCARTA_MONOCYTE_PATHWAY      |
| BIOCARTA_CCR3_PATHWAY          | 22 | -0.343 | -0.012   | 0.172 | 0.97704 | 1 | BIOCARTA_CCR3_PATHWAY          |
| BIOCARTA_ECM_PATHWAY           | 24 | -0.301 | -0.011   | 0.148 | 0.97932 | 1 | BIOCARTA_ECM_PATHWAY           |
| BIOCARTA_WNT_PATHWAY           | 25 | -0.338 | -0.0126  | 0.156 | 0.98463 | 1 | BIOCARTA_WNT_PATHWAY           |
| BIOCARTA_ARAP_PATHWAY          | 17 | -0.433 | -0.0133  | 0.174 | 0.99363 | 1 | BIOCARTA_ARAP_PATHWAY          |
| BIOCARTA_SPPA_PATHWAY          | 22 | -0.423 | -0.0148  | 0.168 | 0.99413 | 1 | BIOCARTA_SPPA_PATHWAY          |
